# Supplementary material for: CO2 Utilization Process Simulation for Enhancing Production of Dimethyl Ether (DME)
Source: Hindawi journal article supplement (doi:10.1155/2020/9716417), 2020-02-22
Supplement: f1 [file 9716417.f1.pdf]

## Data of Sumulation Results for Indirect and Direct DME Syntheses

**Table 1.** Simulation results of DME synthesis through indirect process at methanol reactor pressure of 40 bar and recycled gas flow rate of 1 MMSCFD

| T<br>(°C) | MeOH<br>(Tons/d) | DME<br>(Tons/d) | CO <sub>2</sub> Conv | WK<br>kW | SPC<br>kW/Ton |
|-----------|------------------|-----------------|----------------------|----------|---------------|
| 195       | 0                | 0               | 0                    | 0        |               |
| 204       | 5,750414         | 3,475691        | 0,036892             | 75       | 515           |
| 213       | 17,54108         | 10,53691        | 0,110592             | 75       | 170           |
| 222       | 16,85724         | 10,17987        | 0,106548             | 75       | 176           |
| 231       | 16,21888         | 9,848835        | 0,102781             | 75       | 182           |
| 240       | 15,65062         | 9,553696        | 0,0995               | 75       | 187           |
| 249       | 15,15421         | 9,299231        | 0,096705             | 75       | 193           |
| 258       | 14,73256         | 9,084472        | 0,094426             | 75       | 197           |
| 267       | 14,3717          | 8,901176        | 0,09261              | 75       | 201           |
| 276       | 14,06601         | 8,748957        | 0,091238             | 75       | 205           |
| 285       | 13,80761         | 8,622268        | 0,090289             | 75       | 208           |
| 312       | 13,22866         | 8,267023        | 0,089492             | 75       | 217           |
| 339       | 12,7735          | 7,964162        | 0,091769             | 75       | 225           |
| 366       | 12,28545         | 7,634219        | 0,096904             | 75       | 235           |

**Table 2.** Simulation results of DME synthesis through indirect process at methanol reactor pressure of 40 bar and recycled gas flow rate of 3 MMSCFD

| T<br>(°C) | MeOH<br>(Tons/d) | DME<br>(Tons/d) | CO <sub>2</sub> Conv | WK<br>kW | SPC<br>kW/Ton |
|-----------|------------------|-----------------|----------------------|----------|---------------|
| 195       | 0                | 0               | 0                    | 0        |               |
| 204       | 5,8477           | 3,5381          | 0,0332               | 224      | 1517          |
| 213       | 20,1905          | 12,0365         | 0,1117               | 224      | 446           |
| 222       | 19,5576          | 11,6592         | 0,1085               | 224      | 460           |
| 231       | 18,8388          | 11,2351         | 0,1048               | 224      | 478           |
| 240       | 18,2127          | 10,8931         | 0,1016               | 224      | 493           |
| 249       | 17,6576          | 10,6052         | 0,0989               | 224      | 506           |
| 258       | 17,1887          | 10,3631         | 0,0967               | 224      | 518           |
| 267       | 16,7896          | 10,1602         | 0,0950               | 224      | 528           |
| 276       | 16,4496          | 9,9895          | 0,0937               | 224      | 537           |
| 285       | 16,1686          | 9,8497          | 0,0926               | 224      | 545           |
| 312       | 15,5280          | 9,5504          | 0,0918               | 224      | 562           |
| 339       | 15,0065          | 9,3479          | 0,0940               | 224      | 575           |
| 366       | 14,4388          | 9,0167          | 0,0989               | 224      | 596           |

**Table 3.** Simulation results of DME synthesis through indirect process at methanol reactor pressure of 40 bar and recycled gas flow rate of 5 MMSCFD

| T<br>(°C) | MeOH<br>(Tons/d) | DME<br>(Tons/d) | CO <sub>2</sub> Conv | WK<br>kW | SPC<br>kW/Ton |
|-----------|------------------|-----------------|----------------------|----------|---------------|
| 195       | 0                | 0               | 0                    | 0        |               |
| 204       | 6,0838           | 3,6889          | 0,0310               | 373      | 2425          |
| 213       | 22,6432          | 13,5029         | 0,1116               | 373      | 662           |
| 222       | 22,2792          | 13,2806         | 0,1100               | 373      | 673           |
| 231       | 21,4870          | 12,8082         | 0,1064               | 373      | 698           |
| 240       | 20,8005          | 12,3993         | 0,1033               | 373      | 721           |
| 249       | 20,2002          | 12,0417         | 0,1007               | 373      | 743           |
| 258       | 19,6857          | 11,7357         | 0,0986               | 373      | 762           |
| 267       | 19,2443          | 11,4744         | 0,0967               | 373      | 779           |
| 276       | 18,8707          | 11,2635         | 0,0955               | 373      | 794           |
| 285       | 18,5506          | 11,0988         | 0,0947               | 373      | 806           |
| 312       | 17,8512          | 10,7658         | 0,0938               | 373      | 831           |
| 339       | 17,2740          | 10,5334         | 0,0958               | 373      | 850           |
| 366       | 16,6242          | 10,3104         | 0,1004               | 373      | 868           |

**Table 4.** Simulation results of DME synthesis through indirect process at methanol reactor pressure of 40 bar and recycled gas flow rate of 7 MMSCFD

| T<br>(°C) | MeOH<br>(Tons/d) | DME<br>(Tons/d) | CO <sub>2</sub> Conv | WK<br>kW | SPC<br>kW/Ton |
|-----------|------------------|-----------------|----------------------|----------|---------------|
| 195       | 0                | 0               | 0                    | 0        |               |
| 204       | 6,1889           | 3,7561          | 0,0286               | 522      | 3334          |
| 213       | 24,6138          | 14,7114         | 0,1093               | 522      | 851           |
| 222       | 25,0255          | 14,9171         | 0,1111               | 522      | 839           |
| 231       | 24,1648          | 14,4049         | 0,1076               | 522      | 869           |
| 240       | 23,4115          | 13,9557         | 0,1045               | 522      | 897           |
| 249       | 22,7581          | 13,5662         | 0,1020               | 521      | 923           |
| 258       | 22,1961          | 13,2311         | 0,0999               | 522      | 946           |
| 267       | 21,7185          | 12,9464         | 0,0981               | 522      | 967           |
| 276       | 21,3137          | 12,7052         | 0,0970               | 522      | 985           |
| 285       | 20,9633          | 12,4968         | 0,0962               | 522      | 1002          |
| 312       | 20,2434          | 12,0685         | 0,0951               | 522      | 1037          |
| 339       | 19,5710          | 11,7346         | 0,0972               | 522      | 1067          |
| 366       | 18,8414          | 11,4757         | 0,1015               | 522      | 1092          |

**Table 5.** Simulation results of DME synthesis through direct process at dual DME-methanol reactor pressure of 40 bar and recycled gas flow rate of 1 MMSCFD

| T<br>(°C) | MeOH<br>(Tons/d) | DME<br>(Tons/d) | CO <sub>2</sub> Conv | S-DME  | S-MeOH | WK   | SPC  |
|-----------|------------------|-----------------|----------------------|--------|--------|------|------|
| 195       | 0,0000           | 0,0000          | 0,0000               | 0,0000 | 0,0000 | 0    |      |
| 204       | 13,4282          | 0,1917          | 0,0949               | 0,0186 | 0,9793 | 21,5 | 2693 |
| 213       | 15,1559          | 0,9874          | 0,1132               | 0,0723 | 0,9232 | 23,0 | 559  |
| 222       | 13,8768          | 1,8121          | 0,1112               | 0,1337 | 0,8604 | 24,5 | 324  |
| 231       | 12,6031          | 2,8006          | 0,1105               | 0,2067 | 0,7854 | 26,3 | 225  |
| 240       | 11,3725          | 4,0205          | 0,1121               | 0,2917 | 0,6981 | 28,5 | 170  |
| 249       | 9,9555           | 5,7633          | 0,1166               | 0,4004 | 0,5857 | 31,8 | 132  |
| 258       | 8,6552           | 7,7636          | 0,1243               | 0,5051 | 0,4765 | 35,4 | 110  |
| 267       | 7,7108           | 9,4428          | 0,1321               | 0,5772 | 0,3984 | 38,5 | 98   |
| 276       | 7,3785           | 9,9066          | 0,1348               | 0,5953 | 0,3734 | 39,4 | 95   |
| 285       | 7,3388           | 9,8250          | 0,1344               | 0,5886 | 0,3723 | 39,2 | 96   |
| 312       | 7,4163           | 9,0729          | 0,1325               | 0,5475 | 0,3806 | 37,8 | 100  |
| 339       | 7,4794           | 8,2174          | 0,1330               | 0,4955 | 0,3812 | 36,2 | 106  |
| 366       | 7,4882           | 7,3730          | 0,1358               | 0,4334 | 0,3720 | 34,7 | 113  |

**Table 6.** Simulation results of DME synthesis through direct process at dual DME-methanol reactor pressure of 40 bar and recycled gas flow rate of 3 MMSCFD

| T<br>(°C) | MeOH<br>(Tons/d) | DME<br>(Tons/d) | CO <sub>2</sub> Conv | S-DME  | S-MeOH | WK   | SPC  |
|-----------|------------------|-----------------|----------------------|--------|--------|------|------|
| 195       | 0,0000           | 0,0000          | 0,0000               | 0,0000 | 0,0000 | 0    |      |
| 204       | 13,3776          | 0,1635          | 0,0836               | 0,0167 | 0,9817 | 63,8 | 9363 |
| 213       | 17,6249          | 0,9983          | 0,1152               | 0,0634 | 0,9318 | 65,4 | 1571 |
| 222       | 16,2109          | 1,8834          | 0,1130               | 0,1206 | 0,8731 | 67,0 | 854  |
| 231       | 14,8208          | 2,9227          | 0,1121               | 0,1876 | 0,8041 | 68,9 | 566  |
| 240       | 13,4641          | 4,2135          | 0,1132               | 0,2669 | 0,7224 | 71,3 | 406  |
| 249       | 11,8810          | 6,0608          | 0,1171               | 0,3702 | 0,6152 | 74,7 | 296  |
| 258       | 10,3443          | 8,3335          | 0,1241               | 0,4779 | 0,5027 | 78,9 | 227  |
| 267       | 9,0455           | 10,6061         | 0,1330               | 0,5658 | 0,4084 | 83,1 | 188  |
| 276       | 8,4767           | 11,5248         | 0,1376               | 0,5974 | 0,3694 | 84,8 | 177  |
| 285       | 8,3767           | 11,5126         | 0,1380               | 0,5945 | 0,3640 | 84,8 | 177  |
| 312       | 8,4697           | 10,7295         | 0,1361               | 0,5537 | 0,3698 | 83,3 | 186  |
| 339       | 8,5516           | 9,8834          | 0,1365               | 0,5010 | 0,3689 | 81,7 | 198  |
| 366       | 8,5704           | 8,8638          | 0,1391               | 0,4380 | 0,3582 | 79,7 | 216  |

**Table 7.** Simulation results of DME synthesis through direct process at dual DME-methanol reactor pressure of 40 bar and recycled gas flow rate of 5 MMSCFD

| T<br>(°C) | MeOH<br>(Tons/d) | DME<br>(Tons/d) | CO <sub>2</sub> Conv | S-DME  | S-MeOH | WK    | SPC   |
|-----------|------------------|-----------------|----------------------|--------|--------|-------|-------|
| 195       | 0,0000           | 0,0000          | 0,0000               | 0,0000 | 0,0000 | 0     |       |
| 204       | 12,8677          | 0,1405          | 0,0723               | 0,0156 | 0,9832 | 106,0 | 18116 |
| 213       | 20,1212          | 0,9942          | 0,1166               | 0,0557 | 0,9392 | 107,8 | 2602  |
| 222       | 18,5910          | 1,9290          | 0,1144               | 0,1090 | 0,8844 | 109,5 | 1362  |
| 231       | 17,1157          | 3,0084          | 0,1134               | 0,1707 | 0,8207 | 111,5 | 889   |
| 240       | 15,5984          | 4,3763          | 0,1141               | 0,2458 | 0,7429 | 114,0 | 625   |
| 249       | 13,9232          | 6,2419          | 0,1172               | 0,3405 | 0,6445 | 117,4 | 452   |
| 258       | 12,1447          | 8,7538          | 0,1235               | 0,4501 | 0,5298 | 122,1 | 335   |
| 267       | 10,5146          | 11,5248         | 0,1327               | 0,5489 | 0,4243 | 127,3 | 265   |
| 276       | 9,6273           | 13,1556         | 0,1390               | 0,5960 | 0,3690 | 130,3 | 238   |
| 285       | 9,4238           | 13,2648         | 0,1404               | 0,5984 | 0,3578 | 130,5 | 236   |
| 312       | 9,5211           | 12,4894         | 0,1388               | 0,5582 | 0,3613 | 129,0 | 248   |
| 339       | 9,6201           | 11,5132         | 0,1391               | 0,5046 | 0,3590 | 127,1 | 265   |
| 366       | 9,6481           | 10,3648         | 0,1415               | 0,4403 | 0,3469 | 124,8 | 289   |

**Table 8.** Simulation results of DME synthesis through direct process at dual DME-methanol reactor pressure of 40 bar and recycled gas flow rate of 7 MMSCFD

| T<br>(°C) | MeOH<br>(Tons/d) | DME<br>(Tons/d) | CO <sub>2</sub> Conv | S-DME  | S-MeOH | WK    | SPC   |
|-----------|------------------|-----------------|----------------------|--------|--------|-------|-------|
| 195       | 0,0000           | 0,0000          | 0,0000               | 0,0000 | 0,0000 | 0     |       |
| 204       | 12,4479          | 0,1239          | 0,0636               | 0,0150 | 0,9840 | 148,3 | 28718 |
| 213       | 22,6467          | 0,9637          | 0,1176               | 0,0493 | 0,9454 | 150,2 | 3741  |
| 222       | 20,9865          | 1,9701          | 0,1153               | 0,0995 | 0,8935 | 152,0 | 1852  |
| 231       | 19,3882          | 3,0960          | 0,1141               | 0,1573 | 0,8337 | 154,1 | 1194  |
| 240       | 17,7531          | 4,5256          | 0,1145               | 0,2283 | 0,7599 | 156,7 | 831   |
| 249       | 16,0011          | 6,4177          | 0,1171               | 0,3158 | 0,6687 | 160,2 | 599   |
| 258       | 14,0469          | 9,0098          | 0,1229               | 0,4214 | 0,5579 | 165,0 | 440   |
| 267       | 12,1012          | 12,2315         | 0,1317               | 0,5286 | 0,4436 | 171,1 | 336   |
| 276       | 10,8476          | 14,5529         | 0,1396               | 0,5906 | 0,3728 | 175,4 | 289   |
| 285       | 10,5183          | 14,9192         | 0,1419               | 0,5987 | 0,3555 | 176,1 | 283   |
| 312       | 10,5743          | 14,2023         | 0,1405               | 0,5612 | 0,3539 | 174,6 | 295   |
| 339       | 10,6853          | 13,1427         | 0,1410               | 0,5068 | 0,3507 | 172,5 | 315   |
| 366       | 10,7214          | 11,9564         | 0,1432               | 0,4415 | 0,3376 | 170,1 | 341   |
